# Supplementary material
Source: PubMed Central journal article supplement (PMC4286419)
Supplement: NIHMS636129-supplement-13361_2014_1010_MOESM1_ESM.pdf [file NIHMS636129-supplement-13361_2014_1010_MOESM1_ESM.pdf]

**SUPPORTING INFORMATION**

**Multifaceted Investigation of Metabolites During Nitrogen  
Fixation in Medicago via High Resolution MALDI-MS Imaging  
and ESI-MS**

Erin Gemperline<sup>1</sup>, Dhileepkumar Jayaraman<sup>2</sup>, Junko Maeda<sup>2</sup>, Jean-Michel Ané<sup>2</sup>, Lingjun  
Li<sup>1,3,\*</sup>

<sup>1</sup>Department of Chemistry, University of Wisconsin - Madison, Madison, WI 53706, USA.

<sup>2</sup>Department of Agronomy, University of Wisconsin - Madison, Madison, WI 53706, USA.

<sup>3</sup>School of Pharmacy, University of Wisconsin - Madison, Madison, WI 53705, USA.

\*To whom correspondence should be addressed: Dr. Lingjun Li ([lingjun.li@wisc.edu](mailto:lingjun.li@wisc.edu))

**SUPPORTING INFORMATION****Table S1. Metabolites of Interest ( $m/z$ ) Determined from MALDI-MSI**

|                 |                 |                 |                 |
|-----------------|-----------------|-----------------|-----------------|
| 114.1273        | 221.1853        | 445.2702        | 557.1617        |
| <b>118.0859</b> | <b>225.0840</b> | 464.9456        | 559.3965        |
| 119.0895        | 233.0412        | 465.9908        | 560.3098        |
| <b>133.0603</b> | <b>241.0577</b> | 480.9190        | 564.0486        |
| 140.0651        | <b>252.0500</b> | 481.2299        | 566.4372        |
| <b>155.0422</b> | 254.1019        | 483.2461        | <b>580.0223</b> |
| 156.0414        | <b>257.1462</b> | 485.2628        | 582.4121        |
| 156.0447        | 261.2167        | 487.9736        | 583.9925        |
| 156.0477        | 263.0395        | 498.1682        | 589.5172        |
| <b>158.0397</b> | 273.1203        | 502.9020        | 591.5336        |
| <b>158.1173</b> | 279.0136        | 503.9474        | <b>602.0052</b> |
| <b>171.0162</b> | <b>283.1618</b> | 504.3430        | <b>603.5340</b> |
| 180.0992        | 290.0849        | <b>514.1423</b> | 608.4283        |
| 191.1748        | 291.0831        | <b>520.3395</b> | <b>613.4814</b> |
| 192.9980        | 297.1777        | <b>522.3552</b> | <b>617.1844</b> |
| <b>196.0729</b> | 299.1359        | 524.0563        | 617.5497        |
| 198.0710        | <b>299.2802</b> | 526.3250        | 617.9789        |
| <b>203.1022</b> | 323.1934        | 536.1234        | 747.3759        |
| 208.9719        | 339.2886        | 540.3047        | 749.5071        |
| 210.9760        | 352.9188        | <b>541.3125</b> | 765.4819        |
| 214.9474        | <b>399.1441</b> | 543.3995        | 774.4442        |
| <b>217.0676</b> | 408.0072        | 544.3360        |                 |
| 217.1903        | 423.9813        | 556.2784        |                 |

**Bold** indicates metabolites that have been identified and are listed in Table 1

**Table S2. Metabolites of Interest ( $m/z$ ) Determined from ESI-MS**

|                 |                 |
|-----------------|-----------------|
| <b>104.0708</b> | <b>166.0859</b> |
| <b>114.0915</b> | <b>171.0165</b> |
| <b>116.0706</b> | <b>175.1188</b> |
| <b>118.0863</b> | <b>182.0808</b> |
| <b>118.1228</b> | 192.9986        |
| 120.0807        | <b>195.0862</b> |
| <b>133.0607</b> | <b>203.1024</b> |
| 134.1176        | <b>217.0678</b> |
| <b>148.0603</b> | 387.1927        |
| 149.1242        | 415.2114        |
| <b>155.0425</b> |                 |

**Bold** indicates metabolites that have been identified and are listed in Table 1.
